# Supplementary material
Source: HighWire-hosted journal article supplement (https://erj.ersjournals.com/content/54/2/1901338)
Supplement: inline-supplementary-material-1 [file inline-supplementary-material-1.pdf]

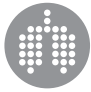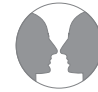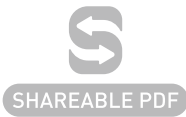

# Lessons learned from animal models: adverse effects of electronic cigarettes

Laimute Taraseviciene-Stewart

**Affiliation:** Dept of Medicine, Division of Pulmonary and Critical Care Sciences, University of Colorado, School of Medicine, Aurora, CO, USA.

**Correspondence:** Laimute Taraseviciene-Stewart, Dept of Medicine, Division of Pulmonary and Critical Care Sciences, University of Colorado, Denver, 12700 E. 19th Ave, Aurora, CO, 80045, USA. E-mail: laima.taraseviciene@ucdenver.edu

 @ERSpublications

**Electronic cigarettes have a signature of harm in the lung that challenges the concept that switching from cigarettes to e-cigarettes is a healthier alternative** <http://bit.ly/2Z3Ahdu>

**Cite this article as:** Taraseviciene-Stewart L. Lessons learned from animal models: adverse effects of electronic cigarettes. *Eur Respir J* 2019; 54: 1901338 [<https://doi.org/10.1183/13993003.01338-2019>].

This single-page version can be shared freely online.

### *From the author:*

We thank R. Emma and colleagues for their interest in our preclinical study to investigate the effects of e-cigarettes on the lung. Our study was initiated from clinical observations that children exposed to second-hand e-cigarette vapour at home and undergoing surgery have a longer recovery and healing time than children from a non-smoking environment. For this reason, our animals underwent whole body (or so called second-hand smoke) exposure to e-cigarette vapour.
